# Supplementary material for: Novel conformational filter allows unambiguous identification of specific conformational ensembles for the large NS3pro/NS2B Dengue-associated protease; Implications for the appropriate choice of protein conformations in drug discovery
Source: Research Square preprint supplement (doi:10.21203/rs.3.rs-3014908/v1), 2023-06-30
Supplement: Supplementary file 1 [file 38b1315bf4aa9c3c904ae309.pdf]

## Supplementary Material

### **Novel conformational filter allows unambiguous identification of specific conformational ensembles for the large NS3pro/NS2B Dengue-associated protease; Implications for the appropriate choice of protein conformations in drug discovery**

Tatiana Agback<sup>2#</sup>, Dmitry Lesovoy<sup>3,6#</sup>, Xiao Han<sup>1</sup>, Alexander Lomzov<sup>4</sup>, Renhua Sun<sup>1</sup>, Tatyana Sandalova<sup>1</sup>, Vladislav Yu. Orekhov<sup>5,6</sup>, Adnane Achour<sup>\*,1</sup>, Peter Agback<sup>\*,2</sup>

<sup>1</sup> Department of Molecular Sciences, Swedish University of Agricultural Sciences, PO Box 7015, SE-750 07 Uppsala, Sweden.

<sup>2</sup> Department of Structural Biology, Shemyakin-Ovchinnikov, Institute of Bioorganic Chemistry RAS, 117997, Moscow, Russia

<sup>3</sup> Swedish NMR Centre, University of Gothenburg, Box 465, Gothenburg, 40530 Sweden

<sup>4</sup> Science for Life Laboratory, Department of Medicine, Karolinska Institute, and Division of Infectious Diseases, Karolinska University Hospital, SE-171 76 Stockholm, Sweden.

<sup>5</sup> Laboratory of Structural Biology, Institute of Chemical Biology and Fundamental Medicine SB RAS, Novosibirsk, 630090, Russia.

<sup>6</sup> Department of Chemistry and Molecular Biology, University of Gothenburg, Box 465, Gothenburg, 40530 Sweden.

# Shared first authors

” Shared last authors

\* Corresponding authors: [Peter.agback@slu.se](mailto:Peter.agback@slu.se)

#### **1.1 Calculation of theoretical NMR spectral densities from correlation functions**

A well-known problem in multi-exponential fitting is the strong sensitivity of the solution to the initial guess of the parameters. For every number of exponents,  $m$ , a set of  $32+16m$  fitting runs were used with starting parameter values  $A_0$ ,  $A_j$ , and  $\tau_j$  chosen according to the assumption that the internal motions take place at significantly different time scales and are uncorrelated (Ferrage and Dorai 2018; Yang 2011). While  $A_0$  was calculated as a product of  $S_1^2 * S_2^2 * S_j^2 * \dots * S_m^2$  (with  $S_j^2$  random values from 0 to 1),  $A_j$  was calculated as  $1 - S_1^2$ ,  $S_1^2 - S_1^2 * S_2^2$  ...  $S_1^2 * S_2^2 * S_{j-1}^2 - S_1^2 * S_2^2 * S_j^2$ , whereas  $\tau_j$  values were randomly chosen from the

corresponding intervals ( $t_{\text{final}}^{j-1/m}$ ,  $t_{\text{final}}^{j/m}$ ). For every  $m$ , the solution with the lowest mean square deviation and with  $A_0 \geq 0$ ,  $A_i \geq 0$ ,  $\tau_i \geq 0$  was chosen. A total of six solutions were obtained ( $m=2\dots7$ ), and the final solution was chosen according to the criteria in which the mean square deviation was significantly reduced with increased number of exponents, *i.e.* along the line of the Bayesian information criterion (BIC). The starting parameters for cross-correlation function approximation were similar, although with  $S_j^2$  random values from -1 to 1 with  $A_0=S_1^2*S_2^2*S_j^2*\dots*S_m^2$ , and the starting  $A_j$  values were calculated as  $P_2(\cos\theta_{\text{HXXH}})-S_1^2$ ,  $S_1^2-S_1^2*S_2^2 \dots S_1^2*S_2^2*S_{j-1}^2-S_1^2*S_2^2*S_j^2$ , where the results were selected by criteria  $\tau_j \geq 0$ .

## 1.2 NOE-based restrained molecular dynamic calculations

Molecular models were relaxed in implicit solvent shell using the steepest-descent minimization of 10,000 steps, followed by a conjugate gradient 10,000-step minimization to remove steric hindrances. Thereafter, the protein molecular models were heated from 0 to 300 K for 100 ps. The Andersen-like temperature coupling scheme was used for temperature regulation (Andersen 1980). Long-range electrostatics were calculated using the particle mesh Ewald algorithm with a 1Å grid (Darden et al. 1993). Hydrogen-containing covalent bonds were constrained using the SHAKE algorithm (Miyamoto and Kollman 1992) and time steps of 2fs were used. Thereafter, all molecular models were solvated using a TIP3P water model (cuboid box, distance 12Å) (Jorgensen et al. 1983) and ionsjc\_tip3p parameters for ions (Joung and Cheatham 2008). Sodium ions were added into periodic simulation systems to neutralize protein charges. Finally, all molecular models were equilibrated using previously described steps (Lomzov et al. 2015).

The models with fixed proteins (constant restraint force of 500 cal/mol/Å<sup>2</sup>) were minimized using the steepest-descent method with 10,000 steps, followed by the conjugate gradient

method comprising 10,000 steps. The system was thereafter heated at a constant volume with fixed proteins for 2.5 ns with time steps of 0.0005ps (constant restraint force of 500 cal/mol/Å<sup>2</sup>). Next, the system density was equilibrated at a constant pressure of 1 bar and a constant temperature at 300 K (NPT ensemble) for 500ps with fixed proteins (constant restraint force of 500 cal/mol/Å<sup>2</sup>). Finally, an equilibration step was performed at constant pressure (1 bar) and temperature (300 K) for 5 ns. A Berendsen-type thermostat and barostat were used (Berendsen et al. 1984).

### **1.3 The diffusion tensor of NS3proS135A/NS2B is best fitted with an isotropic tumbling model**

The conformational state of NS3proS135A/NS2B was evaluated by experimentally measured <sup>15</sup>N-longitudinal relaxation rate (R1), <sup>15</sup>N-transverse relaxation rate (R2), and heteronuclear Overhauser effects (heteronuclear NOE) (Figure S2). A total of 250 resonances were used in the spin relaxation analysis. The residues that were missing or displayed significant broadening were L85, V97, N119, T134, N152, G153, V154, V155, V162, A166 in NS3proS135A, and I76, D81 in NS2B. Analysis performed by Bruker Dynamic centre with an anisotropic tumbling model of NS3proS135A/NS2B produced the axially symmetric model with  $D_{||}/D = 0.907$  and the full asymmetry model with  $D_{xx} = 7.18e+06 (+/- 4.23e+04) s^{-1}$ ,  $D_{yy} = 8.37e+06 (+/- 4.43e+04) s^{-1}$ ,  $D_{zz} = 7.05e+06 (+/- 3.88e+04) s^{-1}$ . No significant improvement was observed over the isotropic tumbling model according to an F-test. Isotropic tumbling model analysis yielded an overall correlation time  $\tau_c$  of 2.08e-08s (with a standard deviation  $\sigma = 1.59e-09s$ ) which associates with a monomeric form of NS3proS135A/NS2B in solution.

Notably, the aggregation of the protein was negligible in the concentration range stretching from 0.2 to 0.8 mM.

#### **1.4 Four main structural ensembles of NS3proS135A /NS2B were identified based on MD calculations with NMR constraints**

MD simulations combined with multiple NMR based constraints are traditionally used to determine the three-dimensional structures of proteins in solution. For small sized folded proteins with rigid architectures, this approach provides most often structural results with very good agreement between X-ray crystallography and NMR spectroscopy approaches. To improve the relaxation properties of the nuclei of larger sized proteins, extensive deuteration of the side chains of amino acid residues is required. This leads often to problems in extracting an **adequate number** of NMR-based constraints. Moreover, for flexible proteins where the obtained experimental NMR data represent an average of ensembles of conformations, special care should be taken in order to not drive the refined structure(s) into a one-conformation minima. Keeping this in mind, **the aim of the first step of this study was** to obtain a limited selection of conformation ensembles that satisfied the limited set of NMR restraints. We therefore chose to use three types of NOE-based restraints including (i) between amide protons (N)H of amino acid residues; (ii) between the amide proton (N)H and side chain methyl protons (C)H<sub>3</sub> of Val, Leu and Iso residues, both intra and inter residues, and (iii) between side chain methyl protons (C)H<sub>3</sub> of Val, Leu and Iso residues. Altogether, 366 NOE-based restraints were used (**Table S1**). A pool of 334 dihedral angle restraints, predicted by TALOS-N based on the backbone <sup>1</sup>HN, <sup>15</sup>N, <sup>13</sup>C<sup>α</sup>, <sup>13</sup>CO and sidechain <sup>13</sup>C<sup>β</sup> chemical shift assignments, previously published by us (Agback et al. 2022), were used.

Based on these restraints (see the material and methods section for specific descriptions), three main conformational ensembles of NS3proS135A/NS2B were identified with likewise penalties. The domain structures of NS3proS135A/NS2B as a ribbon representation of the final water- and NMR-constrained refined ensembles of 10 NMR structures are presented in **Figure S1**, and annotated as ensemble I\* (**Figure S1B**), ensemble II\* (**Figure S1C**) and ensemble III\* (**Figure S1D**) in which the NS3pro N-terminal his-tag is involved in interactions with the co-factor NS2B. Ensemble I and III have a well-structured  $\beta$ -hairpin formed by residues 76-86 whereas for ensemble II this region is more flexible.

Despite the limited number of restraints for the globular NS3proS135A domain, comprising residues 20–170, our calculations resulted in well-defined structures for each tested initial conformational ensemble. Indeed, root mean square deviation (RMSD) values for the backbone  $C_\alpha$  atoms of the 10 obtained structures, following cluster analysis and energy minimization, were 0.97, 1.07 and 1.21 Å for I\*, II\* and III\*, respectively (**Table S2**). Analysis of hydrogen bond interactions formed within NS3pro in the different obtained conformational ensembles for the anti-parallel beta-strands, deduced only from initial calculations from NOEs and dihedral angle restraints, were in agreement with the results from our previous study in which the secondary structure of NS3proS135A/NS2B was predicted using TALOS-N (Agback et al. 2022). Each hydrogen bond was within the range of (N)H...O with upper-bound 2.3Å and (H)N...O=C with upper-bound 3.3Å. As expected, the catalytic triad was not formed due to the introduced S135A mutation (**Figure S1**).

Nevertheless, comparison of the structures of the NS3proS135A domain in the different ensembles are varied essentially according to RMSD obtained in the range 1-170 aa on C $\alpha$  measured between the most represented structures of I\*, II\* and III\* ensembles: 1.75, 3.40 and 3.1Å between I\*- II\*, I\*- III\* and II\*-III\*, respectively (Table S3).

Unsurprisingly, the N- and r C-termini of the NS3proS135A domain are disordered in all three structural ensembles (**Figure S1 B-D**). An unexpected result was found in conformational ensemble III\*, in which the N-terminal **HIS**-tag at one end of the NS3pro domain points towards the C-terminal part of the NS2B co-factor, resulting in specific interactions (**Figure S1D**). The first five N-terminal 43-49 aa residues are disordered (**Figure S1 B-D**) while the following residues 51-57 form a well-defined  $\beta$ -strand. The main differences in the position of the NS2B co-factor in the structural ensembles I\*, II\* and III\* are localized at their C-termini. In the ensemble I\*, the secondary structural element formed by residues 75-90 is well defined, consisting of a loop that bridges two  $\beta$ -strands followed by a short  $\alpha$ -turn, (**Figure S1B**). In contrast, the C-terminal of NS2B displays in the conformation ensembles II\* and III\* a significantly larger amount of conformation discrepancies compared to ensemble I\*. In conclusion, our analyses allowed us to identify the unambiguous presence of three conformational ensemble families for the DENV-2-associated NS3proS135A/NS2B heterodimers that are structurally dispersed, although fulfilling all NMR-based restraints during the performed MD simulations.

## Supplementary Figures

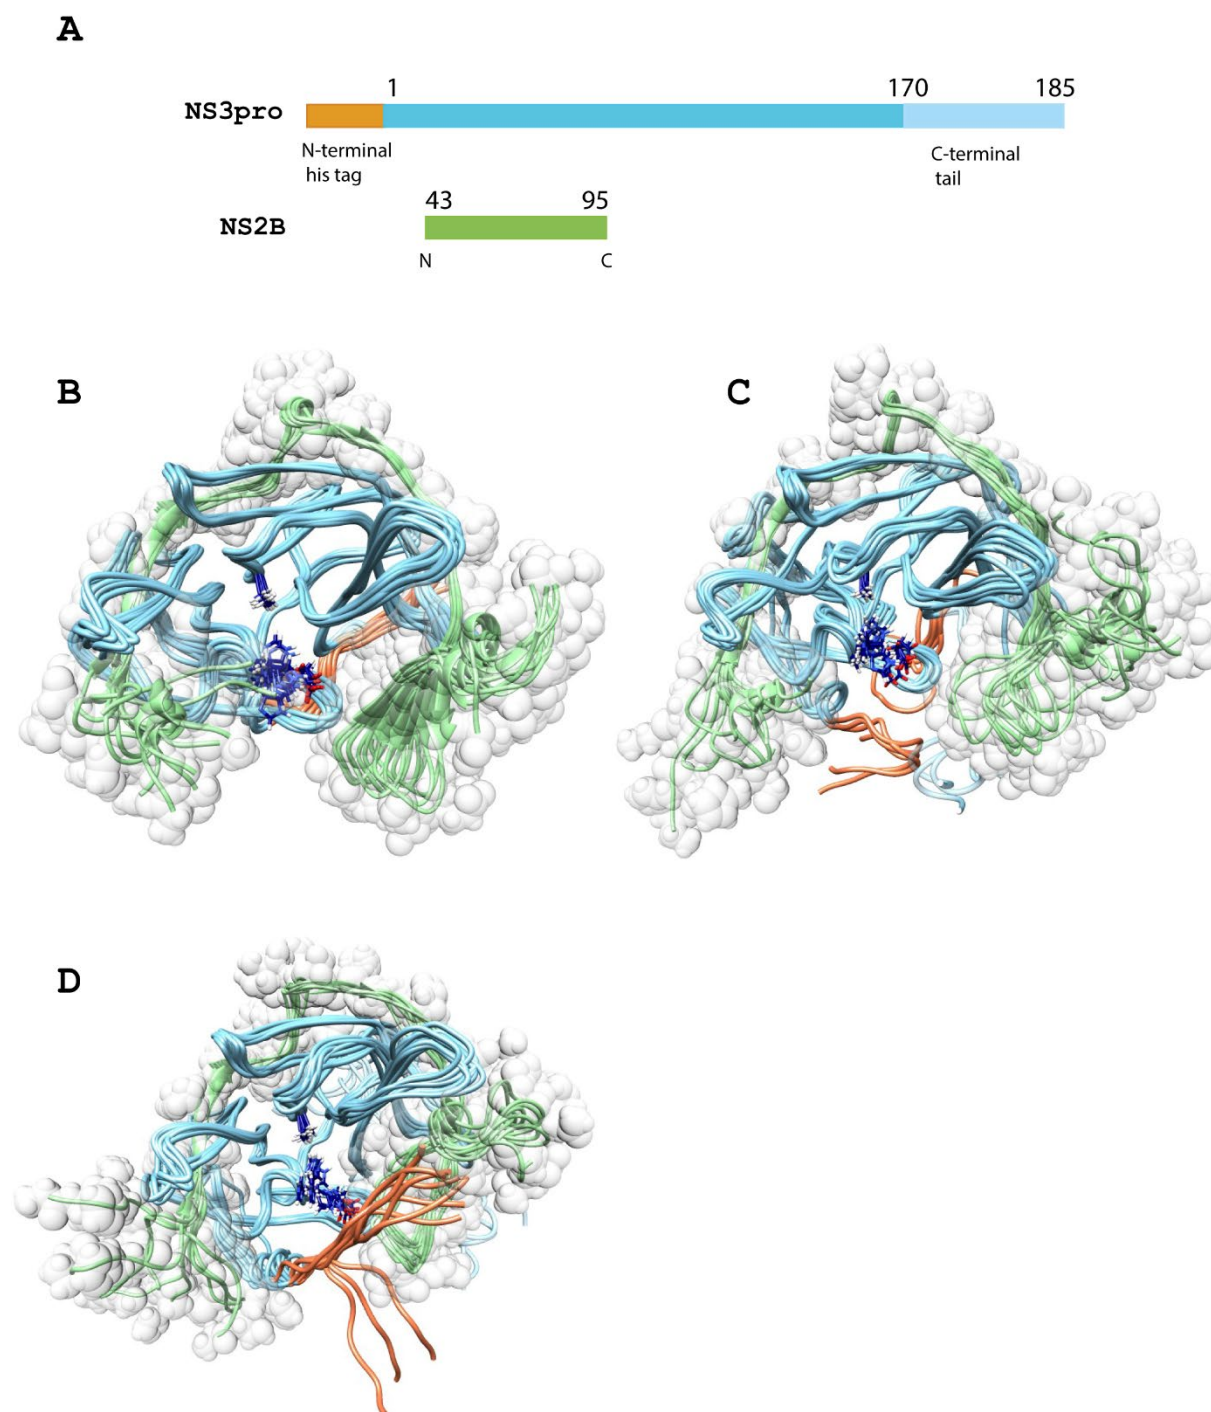

**Figure S1. Ensembles of solution NMR structures of the DENV-2 NS3proS135A/NS2 heterodimer obtained through long 1 $\mu$ s MD simulations.** Domain structure and ribbon representation of the final water- and NMR-constrained refined ensembles of 10 NMR structures of the DENV-2-associated NS3proS135A/NS2B mutated variant are presented, including (A), (B) and (C) I\*, II\* and III\*. All three ensembles were thereafter minimized using the steepest-descent minimization approach based 100000-steps, followed by a conjugate gradient of 100000-step up to

the reaching minimum. The NMR restraints (Table S1) were applied at minimization stage.

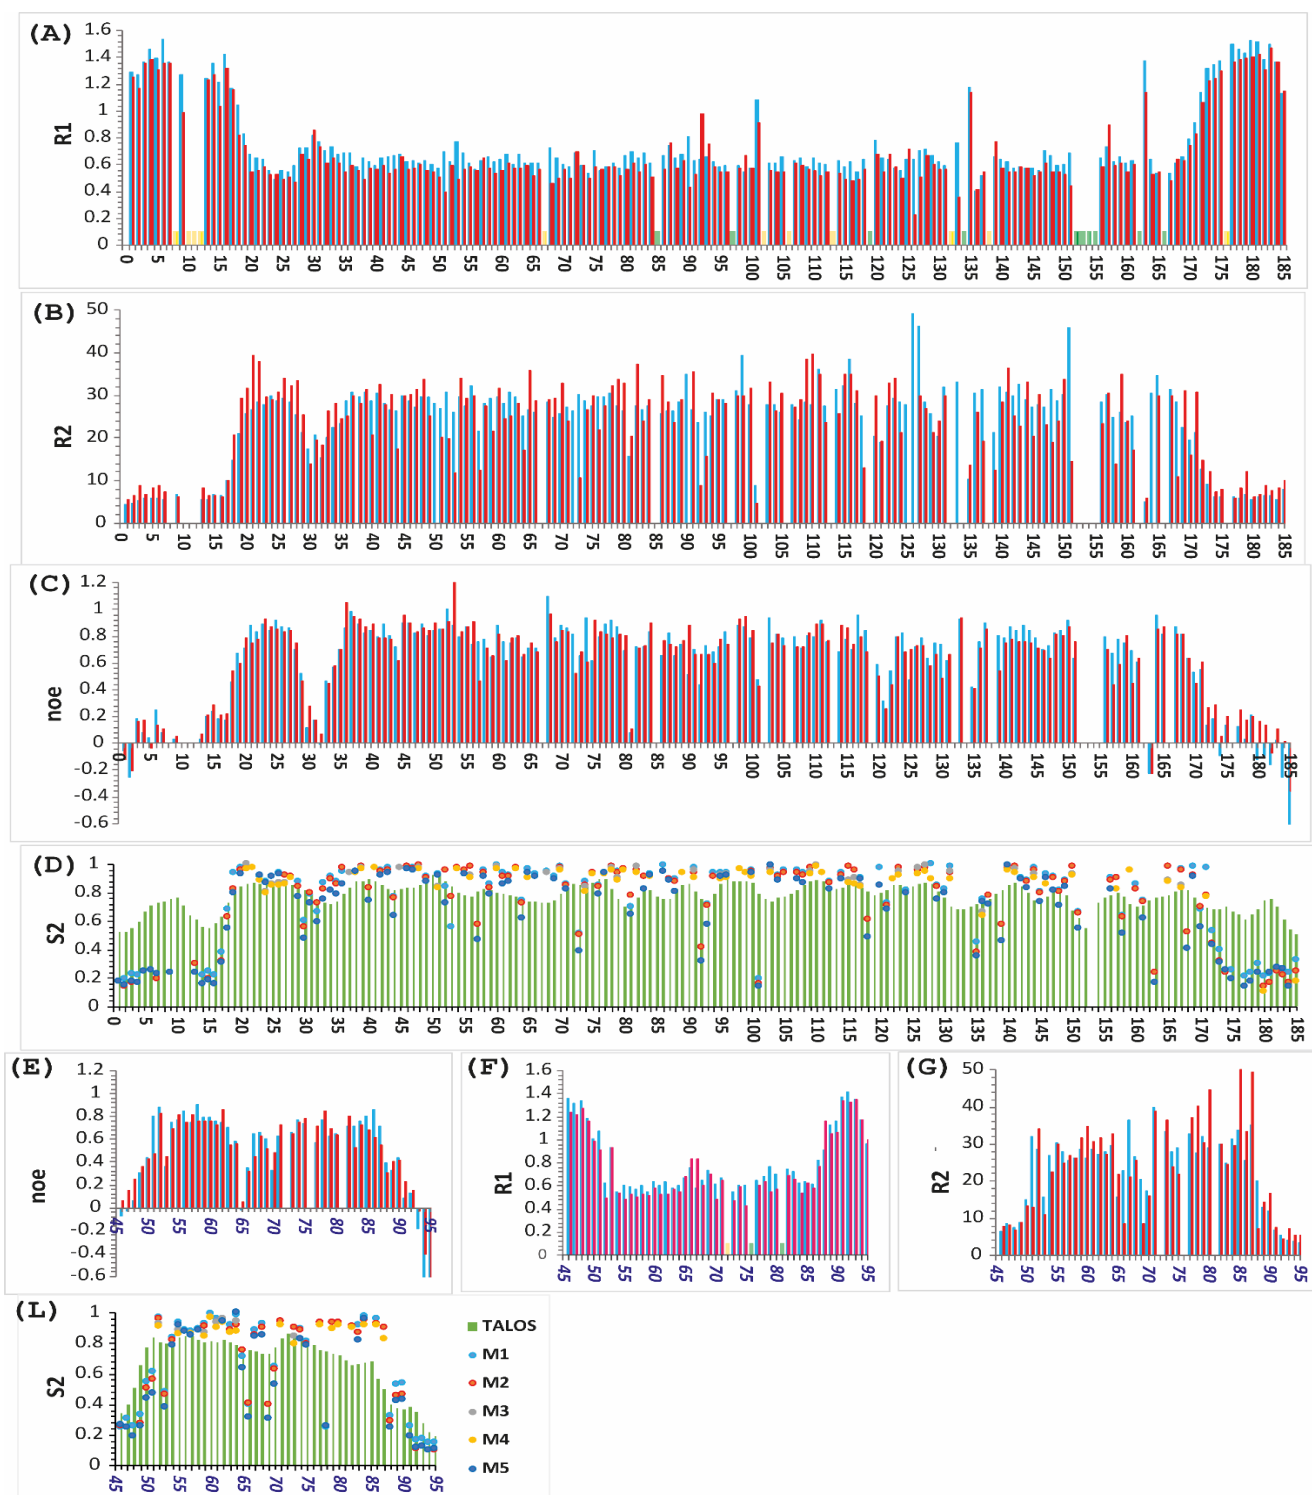

**Figure S2. Dynamic parameters for NS3proS135A (A-D) and NS2B (E-L) obtained at 600 and 700MHz frequencies.** The longitude relaxation rate  $R1(s^{-1})$  is presented for each residue of NS3pro (A) and NS2B (F) domains. The transverse relaxation time  $R2(s^{-1})$  is also presented for NS3proS135A (B) and NS2B (G). The NOE values for



NS3proS135A and NS2B are presented in (C) and (E), respectively. The experimentally obtained  $R1(s^{-1})$ ,  $R2(s^{-1})$  and NOE are represented by blue and red solid brackets for values obtained at 600 and 700MHz frequencies, respectively. The S2 order parameters, extracted from our experimental data,  $R1$ ,  $R2$  and NOE, are presented for NS3proS135A and NS2B in (D) and (L), respectively. Five molecular models free analys,(Lipari and Szabo 1982a; Lipari and Szabo 1982b) M1-M5, were used and the results are presented by circles with different colour, allowing for comparison with results from TALOS predictions. The identity of the different colours is described on the right side of Panel (L). The TALOS-N-predicted S2 order parameters, based on chemical shifts of backbone nuclei, are presented by green solid brackets (D) and (L). Proline and unassigned amino acid NH resonances are shown by short yellow and green boxes, respectively, in panels (A) and (F).

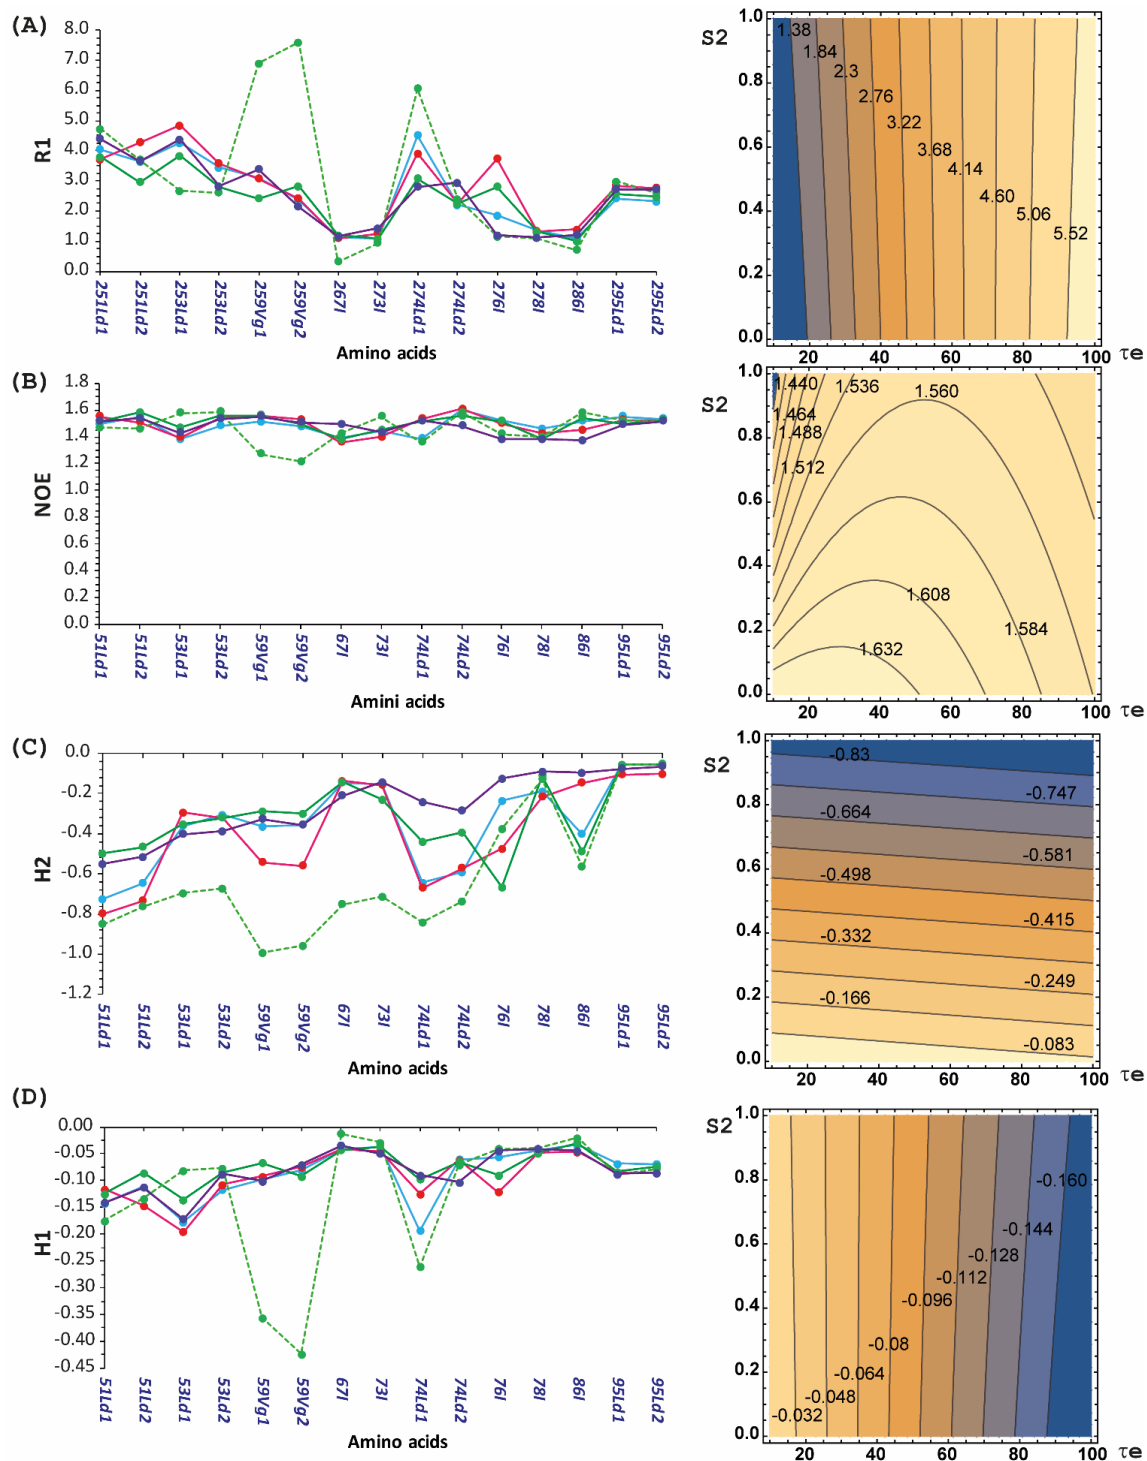

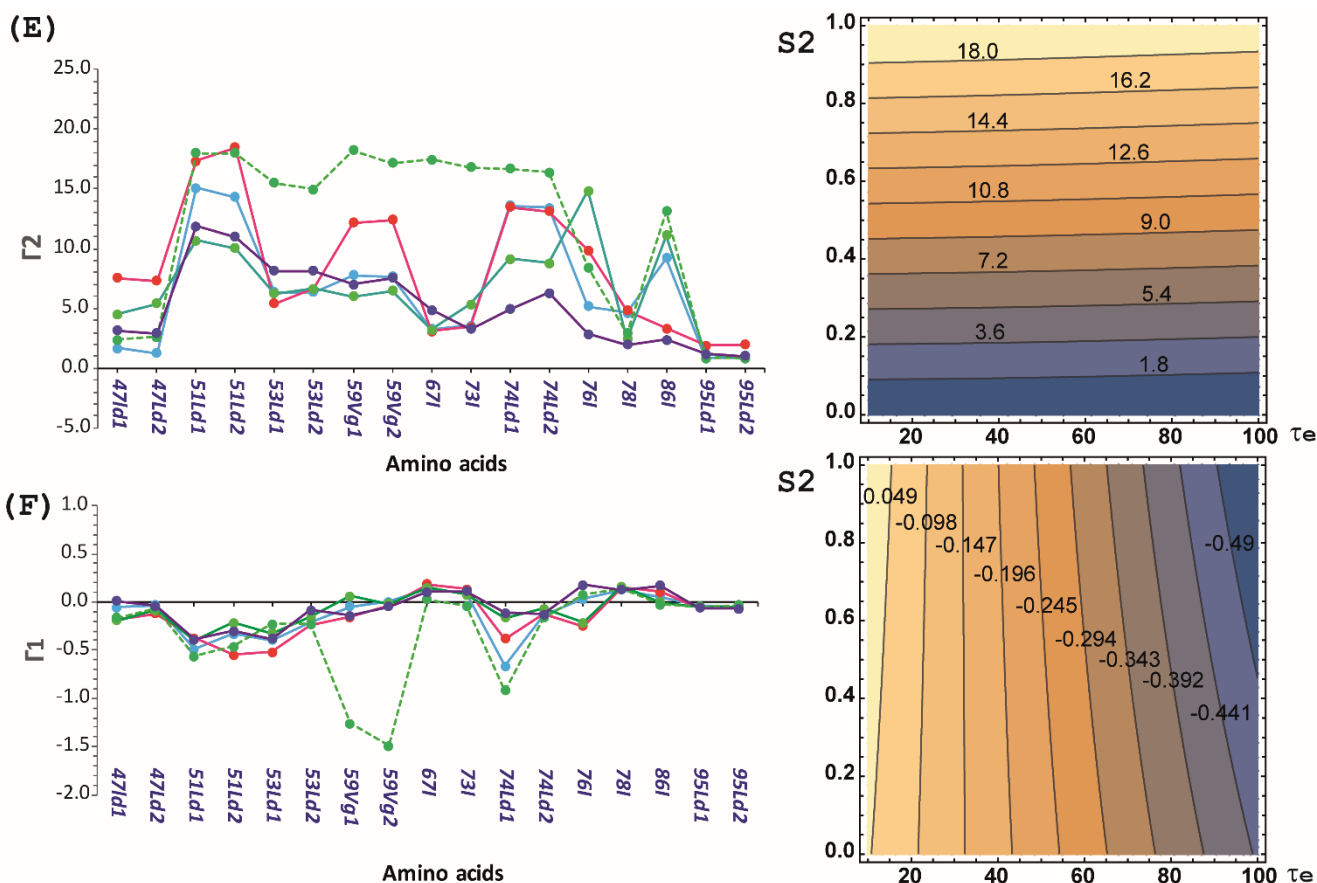

**Figure S3. Simulated relaxation parameters for methyl groups in the different conformation ensembles of the NS2B co-factor obtained from free restraints MD simulations**

Relaxation rates simulated from different trajectories (**left panels**) and their theoretical profiles (**right panels**) as a function of internal motion  $\tau_e$  and amplitude  $S^2$  are presented in (A) longitudinal relaxation rate  $R_1$ , (B) heteronuclear  $^1\text{H}$ - $^{13}\text{C}$  NOE, (C)  $H_1$  and (D)  $H_2$  which are CSA/dipolar cross-correlation contribution to longitudinal  $R_1$  and transverse  $R_2$  relaxation rates, respectively. Finally, the CH-CH dipolar cross-correlations to transverse  $\Gamma_2$  and longitudinal  $\Gamma_1$  relaxation rates are presented in panels E and F, respectively. The theoretically predicted dynamic parameters  $R_1$ ,  $R_2$  and NOE, obtained through measurements of five trajectories are shown by solid lines for each of the different initial ensembles of structural conformations, I (green), II (light blue), III (red), IV (dark blue) and V (green dashed). The  $S^2$  and  $\tau_e$  parameters are annotated as described in **Figure S5**. Relaxation rate values were calculated assuming isotropic tumbling of NS3pro/NS2B with an overall correlation time of 20.8 ns and a proton Larmor frequency of 800 MHz.

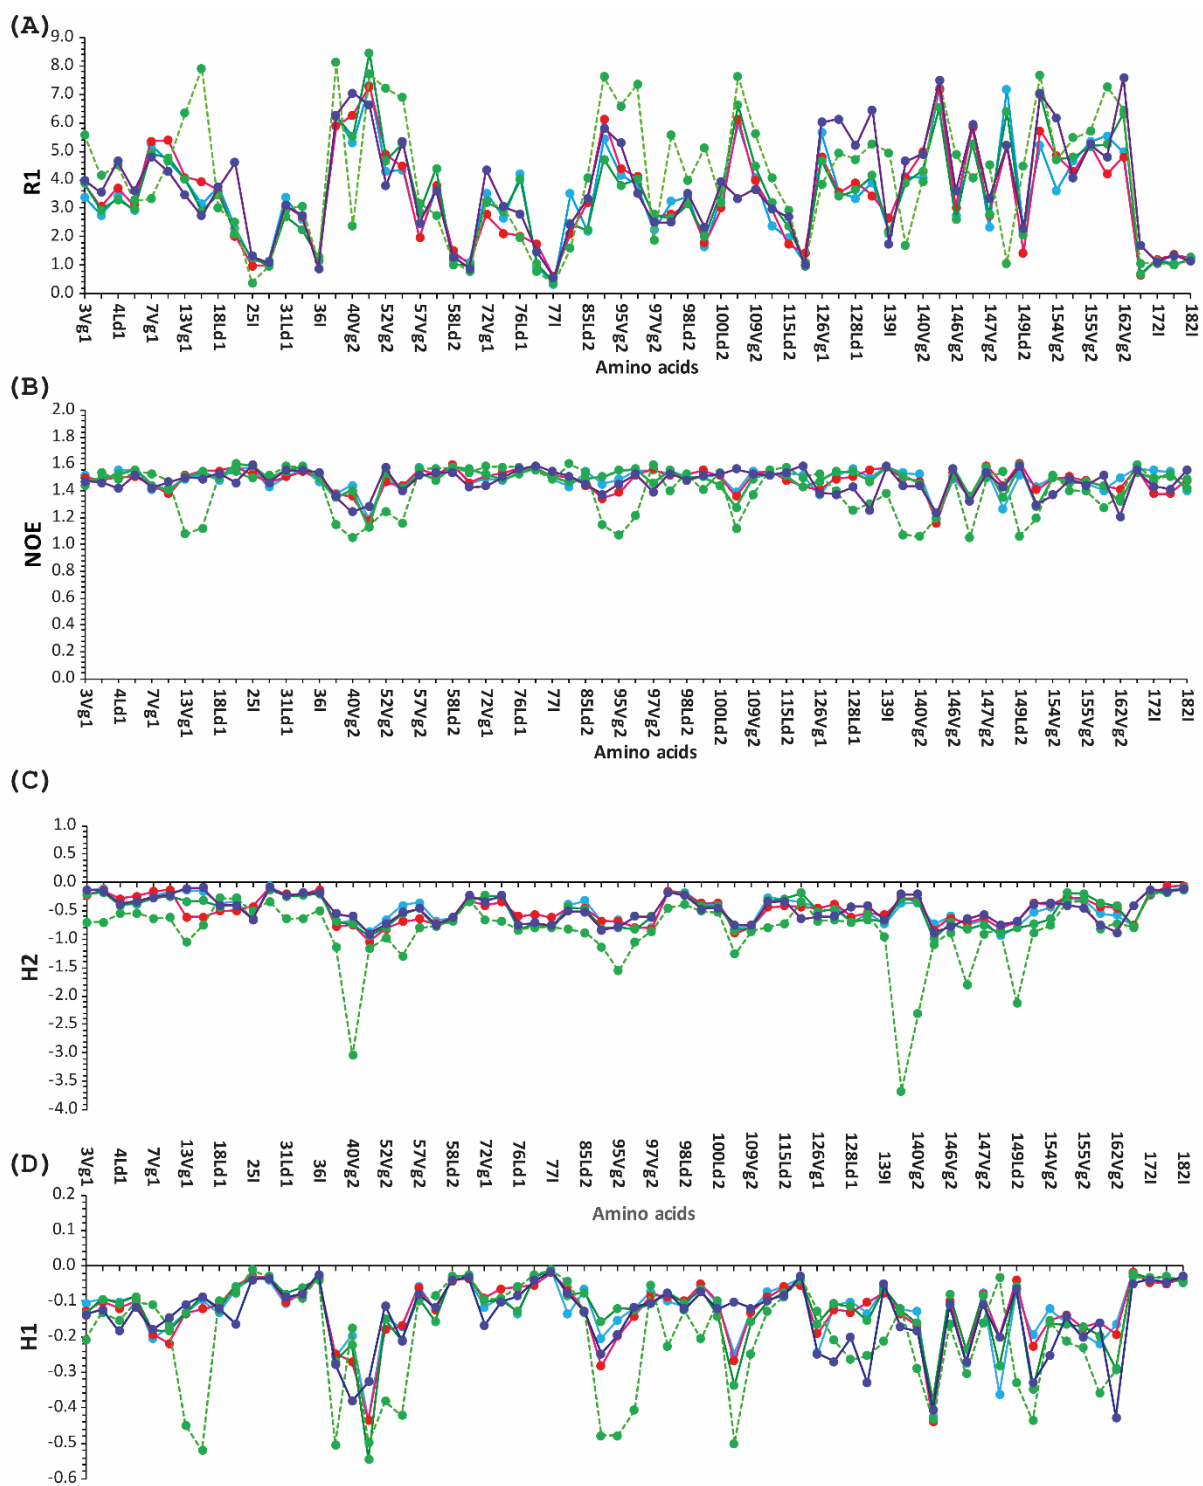

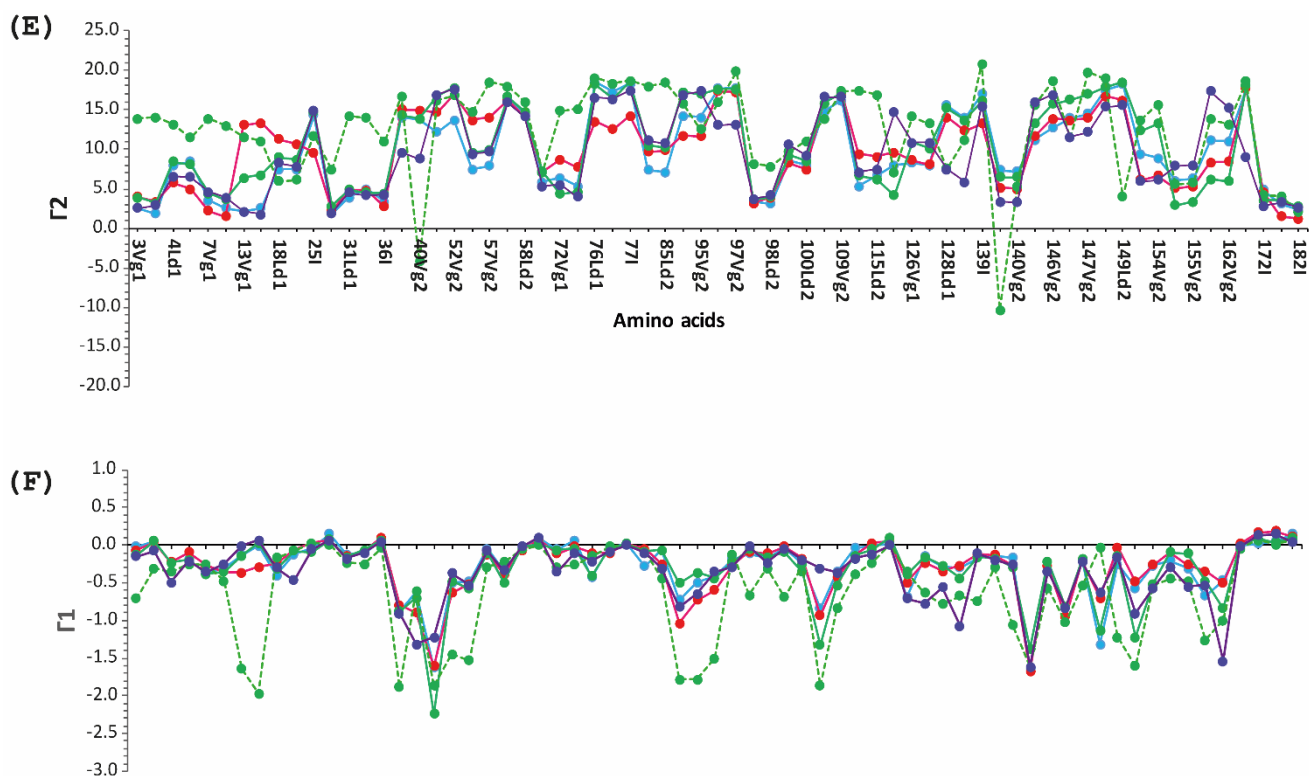

**Figure S4. Simulated relaxation parameters of methyl groups for NS3proS135A among the different identified the conformational ensembles obtained from free restraints MD simulations**

Relaxation rates simulated from different trajectories are presented, including (A) longitudinal relaxation rate  $R_1$ , (B) heteronuclear  $^1\text{H}$ - $^{13}\text{C}$  NOE, (C)  $H_1$  and (D)  $H_2$  which are the CSA/dipolar cross-correlation contributions to longitudinal  $R_1$  and transverse  $R_2$  relaxation rates, respectively. The CH-CH dipolar cross-correlations to transverse  $\Gamma_2$  and longitudinal  $\Gamma_1$  relaxation rates are presented in (E) and (F), respectively. Conformation ensembles I, II, III, IV and V were green, blue, red, dark blue and dashed green, respectively. Relaxation rate values were calculated assuming an isotropic tumbling of NS3pro/NS2B with an overall correlation time  $\tau_c$  of  $2.08 \times 10^{-8}$  s and a proton Larmor frequency of 800MHz.  $S^2$  and  $\tau_c$  parameters are annotated as described in Figure S5.

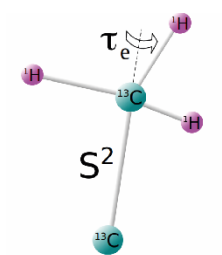

**Figure S5. Simple motional model for a methyl group**

A molecular model of a methyl group includes simultaneous fast free rotation about the C-C' axis with a correlation time  $\tau_e$ , and relatively slow motion of the C-C' axis itself. The corresponding auto correlation order parameter of the C-C' axis is  $S^2$  (Zhang et al. 2006).

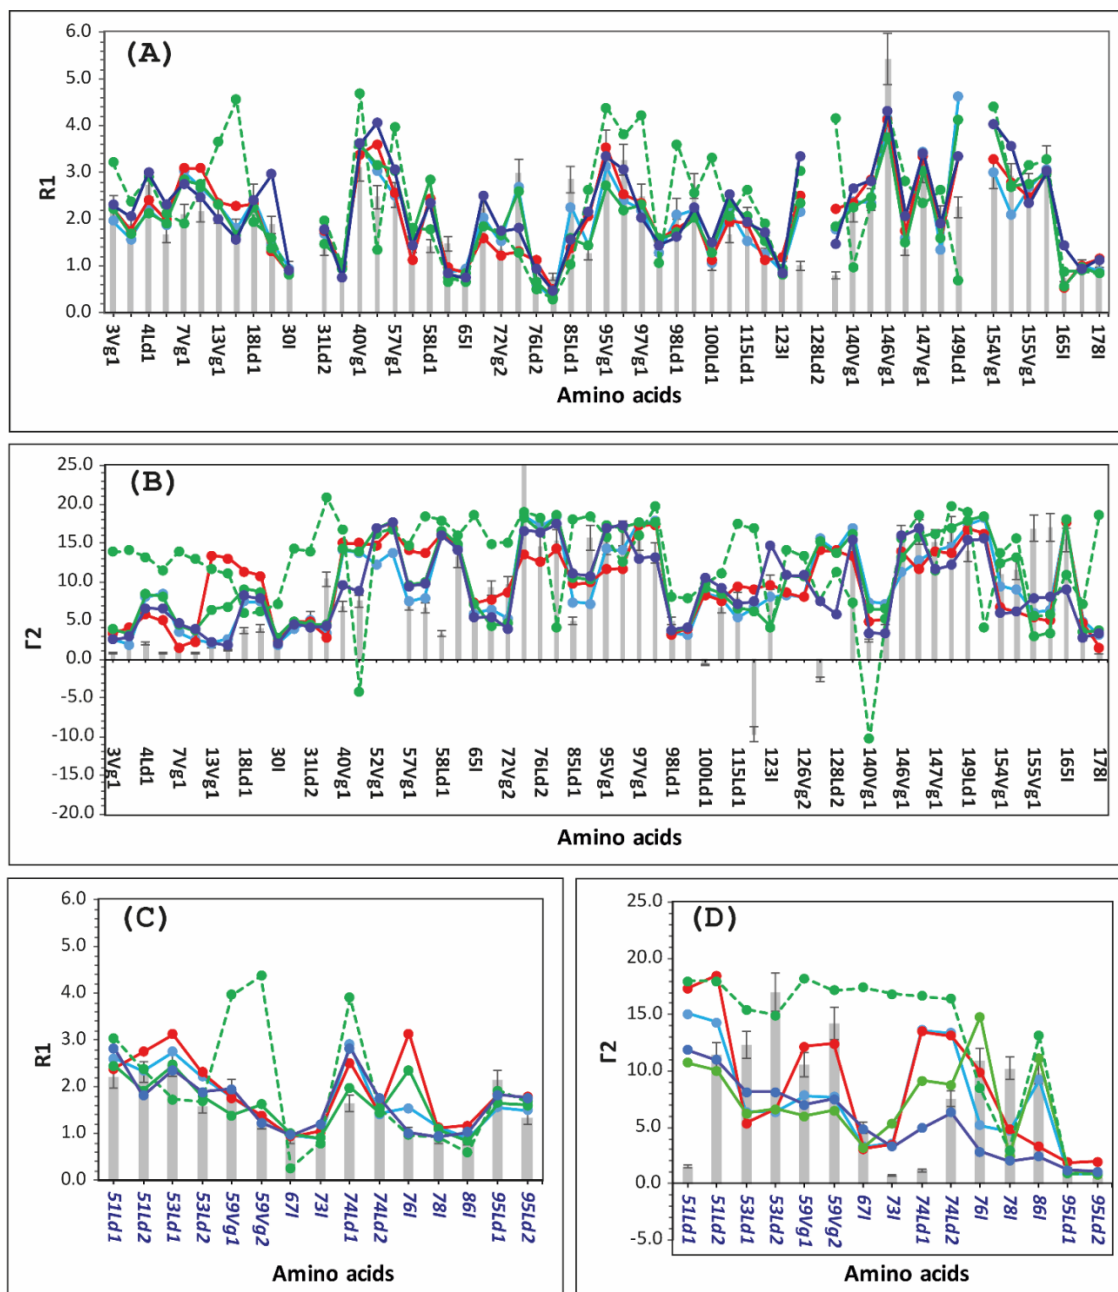

**Figure S6. DENV-2 S135A Methyl dynamical parameters of the NS3proS135A (A, B) and co factor NS2B (C, D) obtained on 800MHz spectrometers**

The relaxation rate values  $R1$  (s $^{-1}$ ), for NS3proS135A and NS2B are presented in panels (A) and (C). The experimentally obtained relaxation time  $\Gamma2$  (s $^{-1}$ ) for NS3proS135A and NS2B are presented by grey solid brackets in panels (B) and (D). The theoretically predicted dynamical parameters  $R1$  and  $\Gamma2$ , derived from five trajectories, are shown by solid lines, coloured in green, light blue, red, dark blue and dashed green and For the conformational ensembles I, II, III; IV and V, respectively.

**Table S1.** NMR and Refinement Statistics for the NS3proS135A/NS2B heterodimer

|                                   |                  |
|-----------------------------------|------------------|
|                                   | NS3proS135A/NS2B |
| <b>Distance restraints:</b>       |                  |
| total NOE                         | 366              |
| Intra-residue                     | 59/14            |
| inter-residue                     |                  |
| sequential ( $ i - j  = 1$ )      | 141/31           |
| medium-range ( $ i - j  \leq 4$ ) | 38/1             |
| long-range ( $ i - j  \geq 5$ )   | 62/1             |
| intermolecular restraints         | 19               |
| sequential NH-NH                  | 99/24            |
| Inter strand NH-NH                | 9                |
| <b>Dihedral restraints</b>        |                  |
| total dihedral restraints         | 334              |
| $\phi$                            | 140/27           |
| $\psi$                            | 140/27           |



**Table S2.** RMSD values in ensembles of 10 structures obtained by cluster analysis of 1  $\mu$ s NMR-restrained trajectory and minimization

| Description         | Ensemble | RMSD values<br>for<br>NS3proS135A,<br>residues 1–170<br>for C $_{\alpha}$ atoms,<br>Å | RMSD values for<br>NS3proS135A,<br>residues 20–170 for<br>C $_{\alpha}$ atoms, Å |
|---------------------|----------|---------------------------------------------------------------------------------------|----------------------------------------------------------------------------------|
| closed conformation | I*       | 1.02                                                                                  | 0.97                                                                             |
| partly opened       | II*      | 2.14                                                                                  | 1.07                                                                             |
| partly opened- tag  | III*     | 1.39                                                                                  | 1.21                                                                             |
| <b>Average</b>      |          | 1.52                                                                                  | 1.08                                                                             |

**Table S3.** RMSD values between the most representative structures obtained by cluster analysis (**structure # 0????**) from a 1  $\mu$ s NMR-restrained trajectory and minimization.

| Description                               | Used annotation | RMSD values for NS3proS135A residues 1–170 for C-alpha atoms, Å | RMSD values for NS3proS135A residues 20–170 for C-alpha atoms, Å |
|-------------------------------------------|-----------------|-----------------------------------------------------------------|------------------------------------------------------------------|
| closed conformation vs partly opened      | I* vs II*       | 1.75                                                            | 1.03                                                             |
| closed conformation vs partly opened- tag | I* vs III*      | 3.40                                                            | 1.38                                                             |
| partly opened vs partly opened- tag       | II* vs III*     | 3.10                                                            | 0.84                                                             |
| <b>Average</b>                            |                 | <b>2.75</b>                                                     | <b>1.08</b>                                                      |

Agback P et al. (2022) H-1, C-13 and N-15 resonance assignment of backbone and IVL-methyl side chain of the S135A mutant NS3pro/NS2B protein of Dengue II virus reveals unique secondary structure features in solution Biomolecular Nmr Assignments 16:135-145  
doi:10.1007/s12104-022-10071-w

Ferrage F, Dorai K (2018) Cross-correlation in Biomolecules. In: Canet D (ed) Cross-relaxation and Cross-correlation Parameters in NMR: Molecular Approaches. Royal Society of Chemistry, Burlington House, Piccadilly, London, W1J 0BA, UK, pp 239-315.  
doi:doi.org/10.1039/9781782622475

Lipari G, Szabo A (1982a) Model-Free Approach to the Interpretation of Nuclear Magnetic-Resonance Relaxation in Macromolecules .1. Theory and Range of Validity J Am Chem Soc 104:4546-4559 doi:DOI 10.1021/ja00381a009

Lipari G, Szabo A (1982b) Model-Free Approach to the Interpretation of Nuclear Magnetic-Resonance Relaxation in Macromolecules .2. Analysis of Experimental Results J Am Chem Soc 104:4559-4570 doi:DOI 10.1021/ja00381a010

Yang DW (2011) Probing Protein Side Chain Dynamics Via C-13 NMR Relaxation Protein Peptide Lett 18:380-395 doi:Doi 10.2174/092986611794653932

Zhang X, Sui XG, Yang DW (2006) Probing methyl dynamics from C-13 autocorrelated and cross-correlated relaxation J Am Chem Soc 128:5073-5081 doi:10.1021/ja057579r
